# Supplementary material
Source: Springer Nature journal article supplement (https://www.springermedizin.de/resource/supplementary/12877_2012_757_MOESM2_ESM.pdf/9440290)
Supplement: MOESM2 [file 9440290]

Metropolitan Hamburg area with 425 000 inhabitants 60 years and older<sup>1</sup>

**Recruitment 2000**

21 general practitioners (GP) in Hamburg recruited at baseline generated List of patients aged 60 years and older assessed for eligibility (n = 9080)<sup>1</sup>

Total excluded (n = 2094)<sup>1</sup>

Sent initial questionnaire to patients (Pra + BADL) for recruitment (n = 6986)<sup>1</sup>

Total excluded (n = 3660)<sup>1</sup>

**Randomization 2000/2001**

**Eligible participants for randomisation at baseline (n = 3326)**  
aged 60 years and older, fully completed Pra and independent in BADL<sup>1</sup> from 14 GPs allocated to training (quality circle) and 7 GPs without training

Randomized ratio 1 : 2

**Intervention group (n=878)**  
- HRA-O questionnaire not completed (n=74)  
- HRA-O feed-back only (n=224)  
- Home visit plus HRA-O feed-back (n=77)  
- Small group session plus HRA-O feed-back (n=503)

**Control group (n=1702)**  
- received usual care

**Comparison group (n=746)**  
- received usual care

**Wave 1 With Embedded RCT 2001/2002**

1-year follow-up not possible (n=46)<sup>2</sup>

1-year follow-up not possible (n=60)<sup>2</sup>

1-year follow-up not possible (n=31)<sup>2</sup>

1-year follow-up (n = 832)  
- HRA-O questionnaire completed (n = 587)  
- HRA-O questionnaire not completed (n = 245)

1-year follow-up (n = 1642)  
- HRA-O questionnaire completed (n = 1376)  
- HRA-O questionnaire not completed (n = 266)

1-year follow-up (n = 715)  
- HRA-O questionnaire completed (n = 582)  
- HRA-O questionnaire not completed (n = 133)

Dead (n = 602)  
Not reached (n = 38)  
Refusals (n = 70)

**Wave 2 2007/2008**

**Wave 2: Sent LUCAS questionnaire for recruitment**  
Longitudinal Urban Cohort Ageing Study LUCAS (n = 2616)

Dead (n = 45)  
Not reached (159)  
Refusals (n = 400)

**Wave 2: Returned questionnaire (n = 2012)**  
LUCAS questionnaire 2007/08

**Subgroup FIT (n=876)**  
Set of 12 marker questions for grading function

**Subgroup pre-FRAIL (n=558)**  
Set of 12 marker questions for grading function

**Subgroup FRAIL (n=578)**  
Set of 12 marker questions for grading function

**Subgroup FORCED (n=414)**  
1 marker question „yes“ displacement after WW II

Dead (n = 64)  
Refusals (n = 94)

**Wave 3 2009/2010**

**Wave 3: Sent questionnaire (n = 1854)**  
LUCAS questionnaire 2009/10

Dead (n = 26)  
Not reached (n = 47)  
Refusals (n = 154)

**Wave 3: Returned questionnaire (n = 1627)**  
LUCAS questionnaire 2009/10

Additional GP practice Recruited with list of patients assessed for eligibility (see procedure 2000)  
Sent LUCAS questionnaire for recruitment LUCAS (n = 581)

Refusals (n = 190)

Returned questionnaire (n = 391)  
LUCAS 2007/08

Pretests with subjects in subgroups FIT, pre-FRAIL, FRAIL, FORCED

Dead (n = 13)  
Refusals (n = 1)

Sent questionnaire (n = 377)  
LUCAS 2009/10

Dead (n = 5)  
Not reached (n = 14)  
Refusals (n = 31)

Returned questionnaire (n = 327)  
LUCAS 2009/10

**Original longitudinal cohort**

**Additional longitudinal cohort**

<sup>1</sup> For details see Figure 3 in Stuck et al. BMC Medical Research Methodology 2007, 7:2

<sup>2</sup> For details see Figure 1 in Dapp et al. J Gerontol A Biol Sci Med Sci 2011
